# Supplementary material for: Phase 1, randomized, parallel-group, double-blind, placebo-controlled trial to evaluate the effects of erenumab (AMG 334) and concomitant sumatriptan on blood pressure in healthy volunteers
Source: PubMed Central journal article supplement — Cephalalgia. 2018 May 21;39(1):100–10. doi: 10.1177/0333102418776017 (PMC6348461; doi:10.1177/0333102418776017), 2018-05-21
Supplement: Supplementary_material.pdf [file Supplementary_material.pdf]

## **Supplementary appendix**

This appendix has been provided by the authors to give readers additional information about their work.

Supplement to: de Hoon J, et al. Phase 1, randomized, parallel-group, double-blind, placebo-controlled trial to evaluate the effects of erenumab (AMG 334) and concomitant sumatriptan on blood pressure in healthy volunteers. *Cephalalgia*.

**Supplementary Table 1.** Pharmacokinetic parameters by cohort.

|                                                           | $t_{\max}$<br>(hr) | $C_{\max}$<br>(ng/ml) | $AUC_{6hr}$<br>(hr*ng/ml) | $AUC_{\infty}$<br>(hr*ng/ml) |
|-----------------------------------------------------------|--------------------|-----------------------|---------------------------|------------------------------|
| Group A, part 1: placebo and sumatriptan<br>( $N = 9$ )   |                    |                       |                           |                              |
| Mean $\pm$ SD                                             | NR                 | 74.6 $\pm$ 16.6       | 131.0 $\pm$ 20.0          | 146.0 $\pm$ 30.6             |
| Min                                                       | 0.17               | 58.8                  | 100.0                     | 106.0                        |
| Median                                                    | 0.27               | 70.7                  | 123.0                     | 138.0                        |
| Max                                                       | 0.53               | 114.0                 | 166.0                     | 213.0                        |
| %CV                                                       | NR                 | 22.2                  | 15.3                      | 21.0                         |
| Group A, part 2: placebo and sumatriptan<br>( $N = 10$ )  |                    |                       |                           |                              |
| Mean $\pm$ SD                                             | NR                 | 86.8 $\pm$ 11.3       | 136.0 $\pm$ 24.7          | 148.0 $\pm$ 33.0             |
| Min                                                       | 0.17               | 66.2                  | 93.5                      | 99.2                         |
| Median                                                    | 0.17               | 91.7                  | 129.0                     | 139.0                        |
| Max                                                       | 0.50               | 98.7                  | 168.0                     | 211.0                        |
| %CV                                                       | NR                 | 13.1                  | 18.2                      | 22.3                         |
| Group B, part 1: placebo and sumatriptan<br>( $N = 20$ )  |                    |                       |                           |                              |
| Mean $\pm$ SD                                             | NR                 | 84.2 $\pm$ 24.0       | 134.0 $\pm$ 23.7          | 146.0 $\pm$ 26.0             |
| Min                                                       | 0.13               | 47.0                  | 104.0                     | 112.0                        |
| Median                                                    | 0.17               | 80.6                  | 129.0                     | 140.0                        |
| Max                                                       | 0.55               | 141.0                 | 208.0                     | 217.0                        |
| %CV                                                       | NR                 | 28.5                  | 17.7                      | 17.9                         |
| Group B, part 2: erenumab and sumatriptan<br>( $N = 20$ ) |                    |                       |                           |                              |
| Mean $\pm$ SD                                             | NR                 | 88.0 $\pm$ 23.2       | 135.0 $\pm$ 22.1          | 149.0 $\pm$ 23.7             |
| Min                                                       | 0.17               | 48.7                  | 105.0                     | 110.0                        |
| Median                                                    | 0.25               | 83.9                  | 134.0                     | 150.0                        |
| Max                                                       | 0.52               | 147.0                 | 199.0                     | 205.0                        |

|     |    |      |      |      |
|-----|----|------|------|------|
| %CV | NR | 26.4 | 16.3 | 16.0 |
|-----|----|------|------|------|

---

AUC: area under the plasma concentration–time curve; AUC<sub>6hr</sub>: AUC from time 0 to 6 hours;

AUC<sub>∞</sub>: AUC from time 0 to infinity; C<sub>max</sub>: maximum observed plasma concentration; CV:

coefficient of variation; NR: not reported; SC: subcutaneous; t<sub>max</sub>: time to reach C<sub>max</sub>.

Actual time in hours post–second dose of sumatriptan used in the analysis.
